# Supplementary material for: Gut microbiota in pregnant Malaysian women: a comparison between trimesters, body mass index and gestational diabetes status
Source: PubMed Central journal article supplement (PMC8876553; doi:10.1186/s12884-022-04472-x), 2022-02-24

**Additional file 1: Supplementary file 1** Shannon rarefaction curve showed a plateau and saturation phase

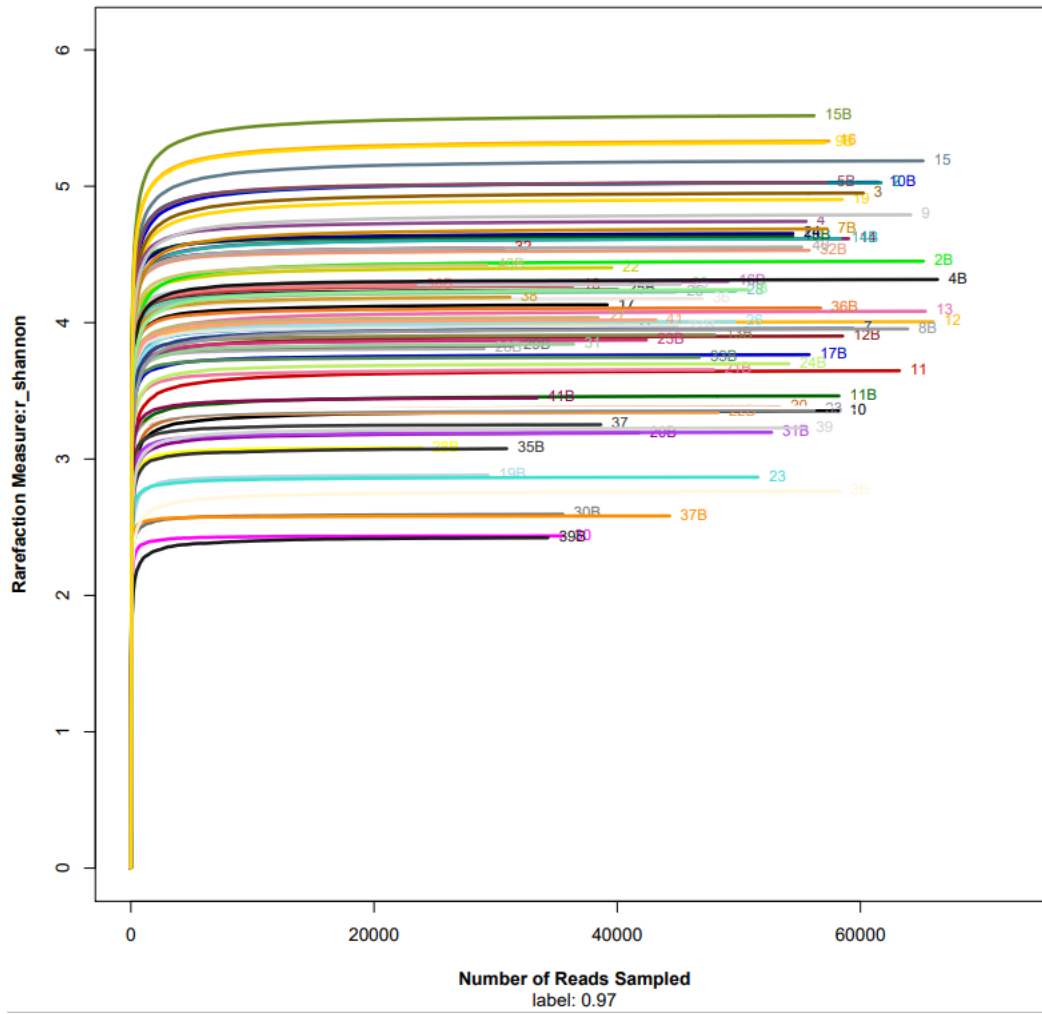

Supplement: 12884_2022_4472_MOESM1_ESM.pdf [file 12884_2022_4472_MOESM1_ESM.pdf]
